# Supplementary material for: Piezoelectric effect in chemical vapour deposition-grown atomic-monolayer triangular molybdenum disulfide piezotronics
Source: PubMed Central journal article supplement (PMC4491182; doi:10.1038/ncomms8430), 2015-06-25
Supplement: ncomms8430-s1.pdf [file ncomms8430-s1.pdf]

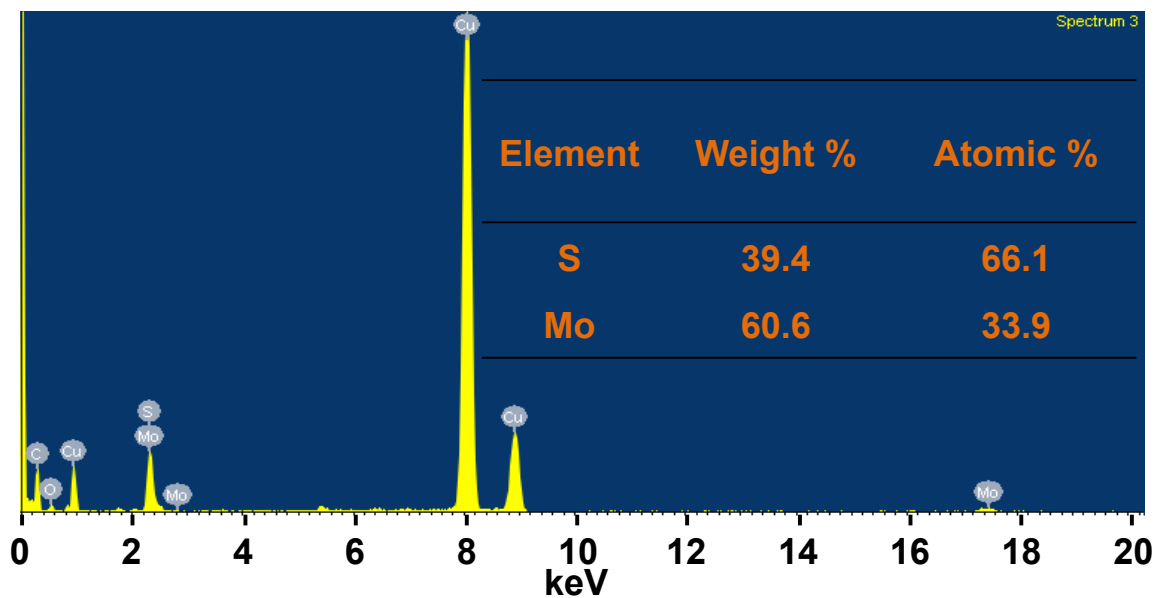

Supplementary Figure 1 TEM-based energy dispersive spectroscopy (TEM-EDS) analysis of the composition ratio of monolayer MoS<sub>2</sub> triangles.

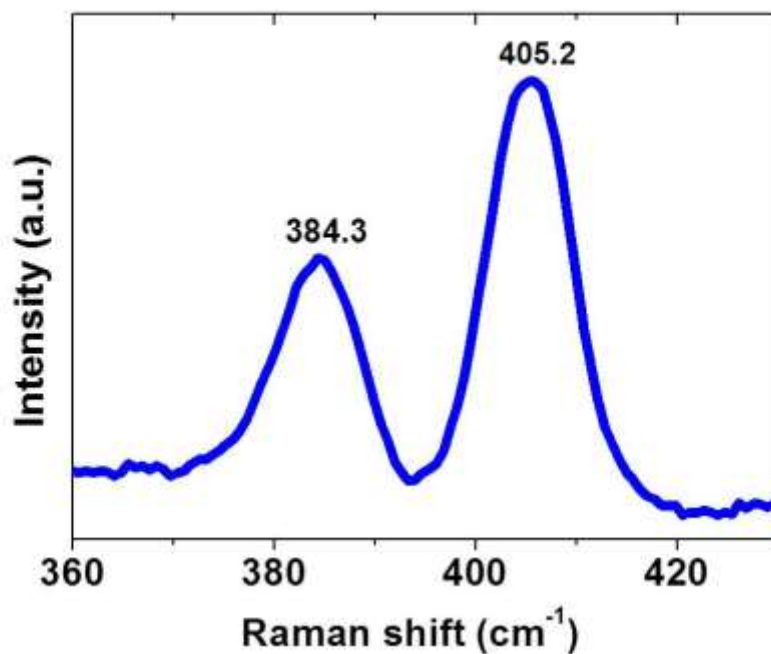

Supplementary Figure 2 Raman spectra for the transferred monolayer MoS<sub>2</sub> on silicon dioxide.

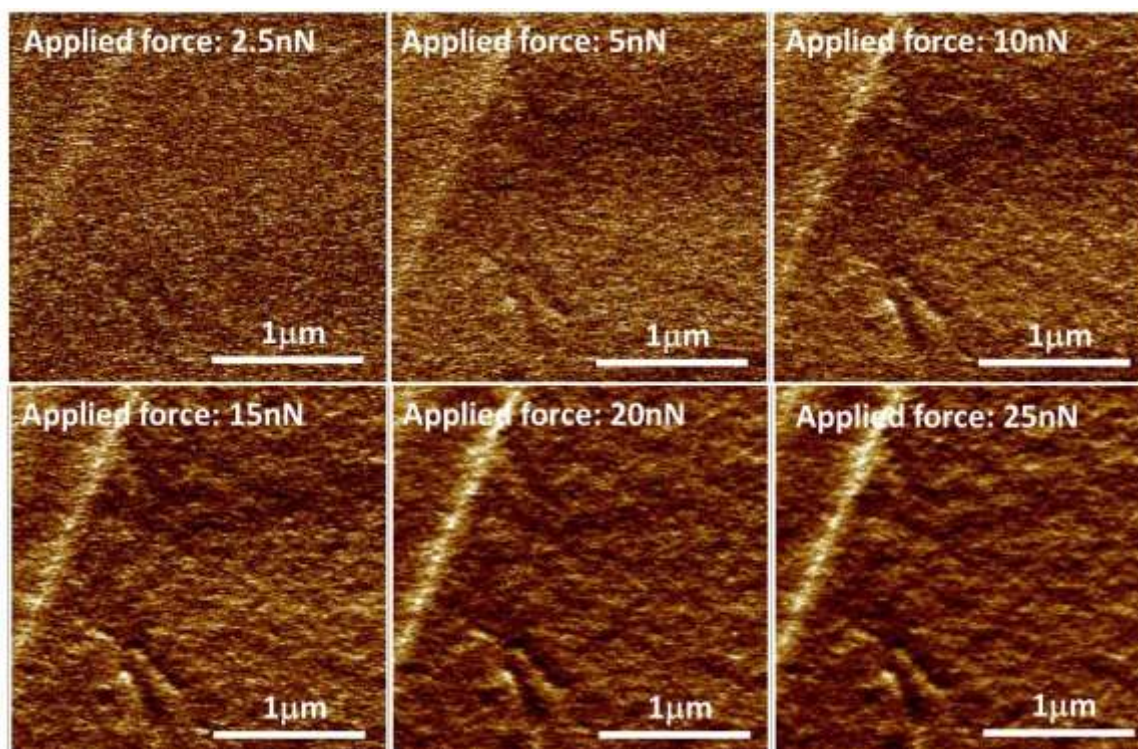

Supplementary Figure 3 Deformation images acquired over a  $2.5 \times 2.5 \mu\text{m}^2$  area in the central region of MoS<sub>2</sub> device under variable mechanical loading forces applied by AFM tip.

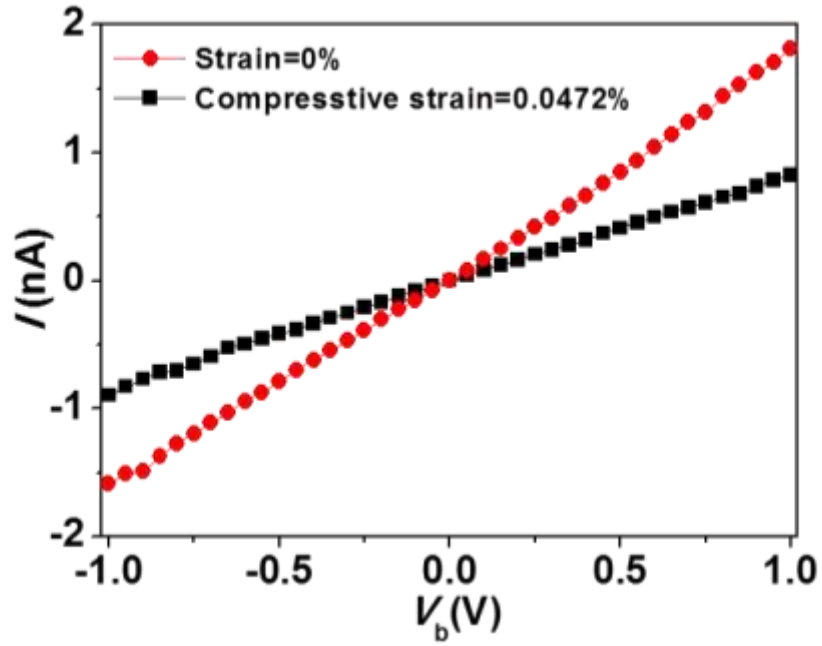

Supplementary Figure 4  $I$ - $V_b$  curves for the highest gauge factor of 1160 in our CVD monolayer MoS<sub>2</sub> strain sensor under free of strain and a mechanical load equivalent to 10nN (strain=0.0472%).
